# Supplementary material for: Cyclam-based iron(iii) and copper(ii) complexes: synthesis, characterization and application as antifungal agents
Source: Royal Society of Chemistry journal article supplement (doi:10.1039/d2nj03161b), 2022-01-01
Supplement: d2nj03161b1.pdf [file d2nj03161b1.pdf]

## Cyclam-based Iron(III) and Copper(II) Complexes: Synthesis, Characterization and Application as Antifungal Agents

Stephanie Almada, Luísa B. Maia, João C. Waerenborgh, Bruno J. C. Vieira, Nuno P. Mira, Elisabete R. Silva, Fátima Cerqueira, Eugénia Pinto, Luis G. Alves

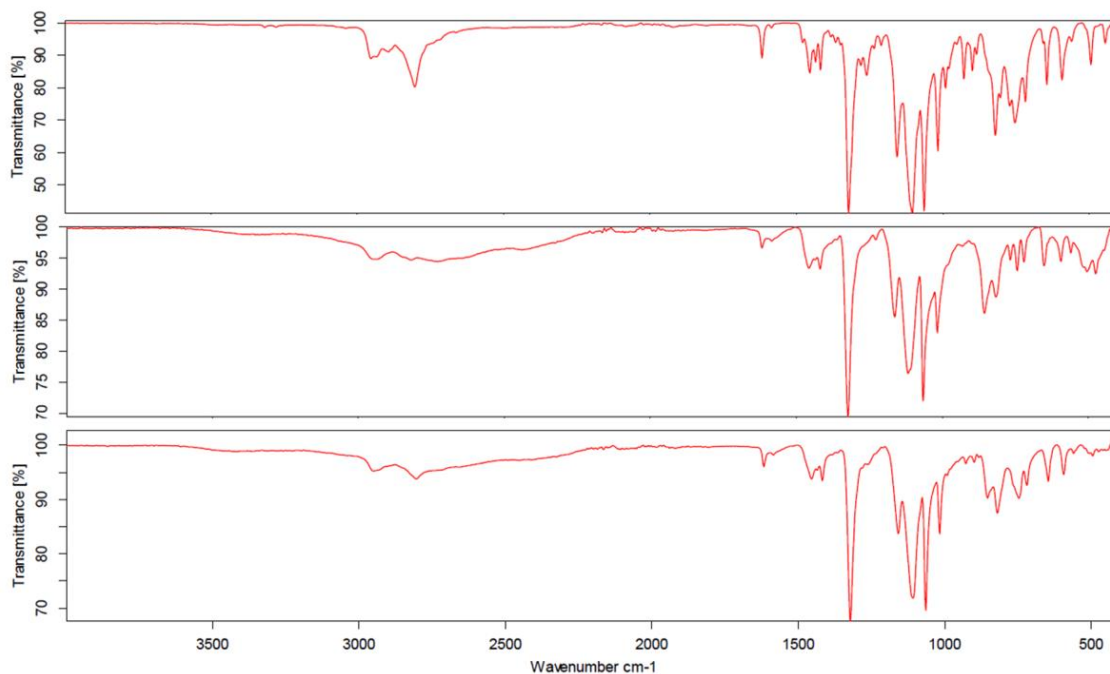

**Figure S11** – IR spectra of H<sub>2</sub>(<sup>4</sup>-CF<sub>3</sub>PhCH<sub>2</sub>)<sub>2</sub>Cyclam, **1**, (top) and [{H<sub>2</sub>(<sup>4</sup>-CF<sub>3</sub>PhCH<sub>2</sub>)<sub>2</sub>Cyclam}FeCl<sub>2</sub>]Cl, **2**, obtained in solution (middle) and in the solid state (bottom).

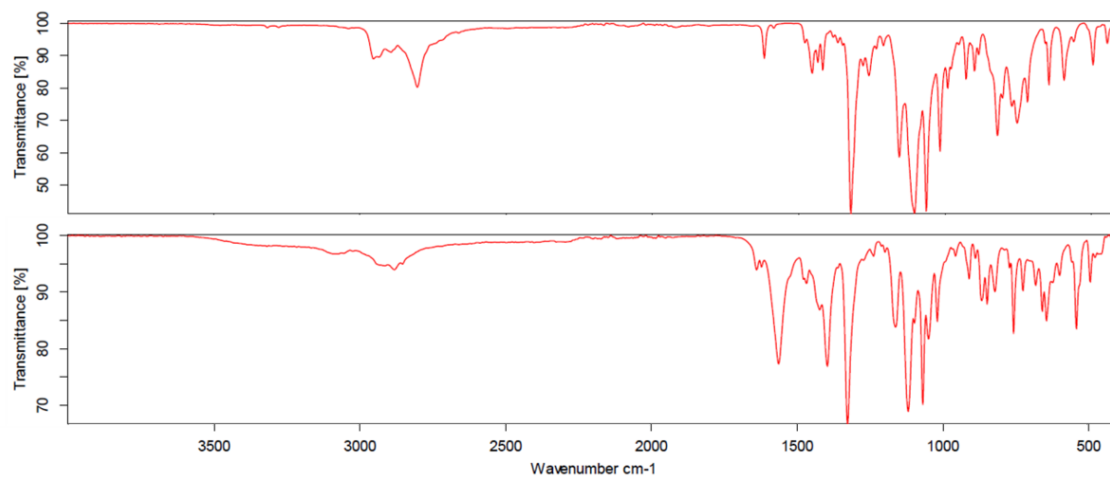

**Figure S12** – IR spectra of H<sub>2</sub>(<sup>4</sup>-CF<sub>3</sub>PhCH<sub>2</sub>)<sub>2</sub>Cyclam, **1**, (top) and [{H<sub>2</sub>(<sup>4</sup>-CF<sub>3</sub>PhCH<sub>2</sub>)<sub>2</sub>Cyclam}Cu](CH<sub>3</sub>COO)<sub>2</sub>·2H<sub>2</sub>O, **3**, (bottom).

**Table S11** – Estimated parameters from the  $^{57}\text{Fe}$  Mössbauer spectra of [ $\{\text{H}_2(^{4-\text{CF}_3}\text{PhCH}_2)_2\text{Cyclam}\}\text{FeCl}_2\text{]Cl$ , **2**.

|                        | T (K) | spin state | IS (mm/s) | QS (mm/s) | $B_{\text{hf}}$ (T) | I (%) |
|------------------------|-------|------------|-----------|-----------|---------------------|-------|
| <b>2</b> (solution)    | 80    | HS         | 0.48      | 0.67      | -                   | 71    |
|                        |       | LS         | 0.39      | 1.54      | -                   | 29    |
| <b>2</b> (solution)    | 4     | HS         | 0.50      | -0.23     | 47.0                | 75    |
|                        |       | LS         | 0.40      | 1.59      | -                   | 25    |
| <b>2</b> (solid state) | 80    | HS         | 0.48      | 0.73      | -                   | 75    |
|                        |       | LS         | 0.37      | 1.32      | -                   | 25    |
| <b>2</b> (solid state) | 4     | HS         | 0.48      | -0.15     | 46.7                | 79    |
|                        |       | LS         | 0.35      | 1.33      | -                   | 21    |

IS isomer shift relative to metallic  $\alpha\text{-Fe}$  at 295 K; QS quadrupole splitting.  $2\varepsilon = (e^2V_{zz}Q/4)(3\cos^2\theta-1)$  quadrupole shift estimated for the sextets.  $B_{\text{hf}}$  magnetic hyperfine field; I relative area. Estimated errors are  $<0.02$  mm/s for IS, QS,  $\varepsilon$  and  $<2\%$  for I

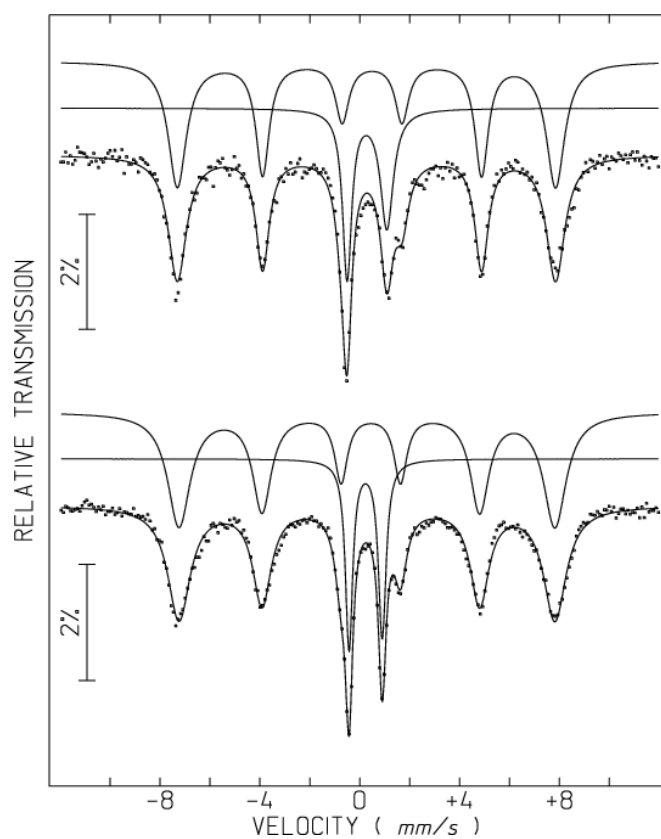

**Figure S13** –  $^{57}\text{Fe}$  Mössbauer spectra, at 4K, of [ $\{\text{H}_2(^{4-\text{CF}_3}\text{PhCH}_2)_2\text{Cyclam}\}\text{FeCl}_2\text{]Cl$ , **2**, obtained in solution (top) and in the solid state (bottom).

**Table S12** – Hydrogen bond distances (Å) and angles (°) of complexes **3a** and **3b**.

|           | D-H $\cdots$ A           | d(D-H)   | d(H $\cdots$ A) | d(D $\cdots$ A) | (D $\hat{H}$ A) | Symmetry operation |
|-----------|--------------------------|----------|-----------------|-----------------|-----------------|--------------------|
| <b>3a</b> | O(1)-H(1O) $\cdots$ O(2) | 0.82(12) | 1.94(11)        | 2.708(13)       | 155(12)         | 1-x, -y, 1-z       |
|           | O(1)-H(2O) $\cdots$ O(2) | 0.89(11) | 2.13(11)        | 2.970(15)       | 157(9)          |                    |
|           | O(1)-H(2O) $\cdots$ O(3) | 0.89(11) | 2.47(11)        | 3.230(12)       | 143(8)          |                    |
|           | N(2)-H(2N) $\cdots$ O(3) | 1.00(7)  | 1.84(7)         | 2.774(10)       | 154(6)          | 1-x, -y, -z        |
| <b>3b</b> | O(1)-H(1O) $\cdots$ O(2) | 0.86     | 1.82            | 2.660(5)        | 166             | 1+x, y, z          |
|           | O(4)-H(4O) $\cdots$ O(2) | 0.96     | 1.83            | 2.778(5)        | 169             |                    |
|           | N(2)-H(2N) $\cdots$ O(3) | 1.05(7)  | 1.78(7)         | 2.816(6)        | 167(6)          | 1+x, y, z          |

**Table S13** – Minimal Inhibitory Concentration (MIC,  $\mu\text{g/mL}$ ) and Minimal Lethal Concentration (MLC,  $\mu\text{g/mL}$ ) for compounds **4** and **5**.

|                                         |     | <b>4</b> | <b>5</b> |
|-----------------------------------------|-----|----------|----------|
| <i>Candida albicans</i> ATCC10231       | MIC | 128      | 128      |
|                                         | MLC | 128      | 128      |
| <i>Candida albicans</i> H37             | MIC | 32       | 64       |
|                                         | MLC | 128      | 64       |
| <i>Candida krusei</i> ATCC6258          | MIC | 8        | 8        |
|                                         | MLC | 8        | 8        |
| <i>Candida krusei</i> H9                | MIC | 8        | 8        |
|                                         | MLC | 8        | 8        |
| <i>Cryptococcus neoformans</i> CECT1078 | MIC | 4        | 4        |
|                                         | MLC | 8        | 8        |
